# Supplementary material
Source: PubMed Central journal article supplement (PMC8063298)

Figure S1. ERBB2 expression is upregulated in H1299 cells transfected with pcDNA-ERBB2. (A) According to quantitative PCR, the mRNA expression levels of ERBB2 were significantly increased in the pcDNA-ERBB2 group compared with in the NC and pcDNA-NC groups. (B) Western blotting revealed that the protein expression levels of ERBB2 were significantly increased in the pcDNA-ERBB2 group compared with in the NC and pcDNA-NC groups. Blank, untreated H1299 cells; pcDNA-ERBB2, H1299 cells transfected with pcDNA-ERBB2; pcDNA-NC, H1299 cells transfected with pcDNA-NC. ERBB2, erb-b2 receptor tyrosine kinase 2; NC, negative control. \*\*P<0.01 vs. pcDNA-NC.

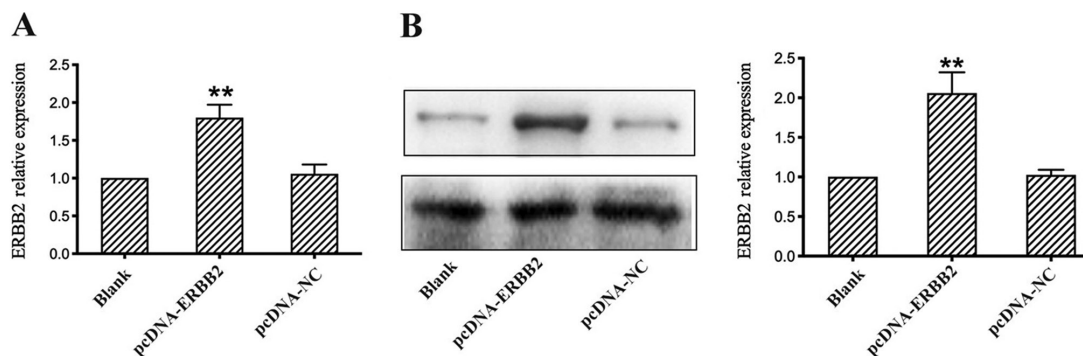

Supplement: Supplementary_Data.pdf [file Supplementary_Data.pdf]
